# Supplementary material for: Assessment of the Sustainability Performance of Eco-Engineering Measures in the Mediterranean Region
Source: MDPI journal article supplement (doi:10.3390/land11040533), 2022-04-06
Supplement: s1 [file s1]

## Supplementary Material: S1: Questionnaire Survey template

**CASE STUDY SURVEY TEMPLATE INSTRUCTIONS:** ECOMED is seeking case study examples (successful and unsuccessful) that demonstrate the soil and water-bioengineering practice across the Mediterranean. This template has been developed to get information specific to that process so that others may learn and implement these concepts into future projects. Please insert text in all sections as requested. If information is not available or not applicable to the project, just type N/A in the space. If you consider that you can provide more information which is not covered in this survey, please state the details of this in the last section.

### GENERAL INFORMATION

**Project title:**

**Location:**

**City:**

**State:**

**Country:**

**Project Site area [m<sup>2</sup>]:**

**Bioengineering solution(s) implemented:**

**Project Type:**

**Coastal**

**Fluvial**

**Slope**

**Delivery Method:**

**Total project costs:** [Cost/m<sup>2</sup> ]

**Total bioengineering costs:** [Cost/m<sup>2</sup> ]

**Owner (client):**

**Designer/Contractor/Architect/Project Team:**

**ECOMED Contact Person:**

### DESCRIPTION

1. Enter a short description of the project including the number and scope of bioengineering works, history and completion date, site conditions/context, and community.

(max. 250 words; include a map/photo if possible)

2. Enter a description of the significant aspects of the project including a synopsis of project goals that address each of the following topics:

a. accessibility,

- b. aesthetic,
- c. cost-effectiveness,
- d. functionality,
- e. historic preservation/significance,
- f. productivity,
- g. restoration,
- h. security/safety/stability,
- i. sustainability.

(max. 250 words; include a design drawing/detail/photo if possible)

**Overall Project Goal/Philosophy:**

**Stability/Safety Goal:**

**Sustainability Goal:**

**Functionality Goal:**

**Accessibility Goal:**

**Aesthetic Goal:**

**Cost-Effectiveness Goal:**

**Preservation/Restoration Goal:**

**Productivity Goal:**

**Other Significant Aspects of the Project:**

**PROCESS**

Describe each phase of the process in detail and how the above listed topics were addressed. Describe both positive and negative aspects of the process.

Project Phases include: Pre-design/Planning, Design, Construction, Operations/Maintenance, and Monitoring and Decommissioning.

(max 500 words)

**Overview of Process:**

**Pre-Design/Planning Activities:**

**Design Activities:**

**Construction Activities:**

**Operations/Maintenance Activities:**

**Monitoring Activities:**

**Decommissioning Activities:**

**INFORMATION AND TOOLS**

List up to five information resources (e.g. databases, datasets) and/or software tools that were utilized in the design/construction of the project. If websites were used, describe aspects of the websites that were most effective.  
(max 100 words)

**PRODUCTS AND SYSTEMS**

Describe how the construction materials, systems and product selection addressed the following topics: accessible, aesthetic, cost-effective, functional, historic preservation, productive, secure/safe, and sustainable.  
(max 250 words)

**PROJECT RESULTS**

**Lessons Learned:** Describe goals that were met and goals that were not achieved (especially the ones relating to accessibility, aesthetics, cost-effectiveness, functionality, productivity, stability, and sustainability) and the reasons for these outcomes.  
(max 250 words)

**Ratings:** List any Quality Assurance/Management ratings of this project including date and level achieved.  
(max 50 words)

**Awards:** List any awards associated with this project including award name, date, category.  
(max. 75 words)

**Publications:** List any book, periodical, or website/database (if any) in which this project has appeared including: publication name, publisher, publication date, volume, issue, page or URL.  
(max. 75 words)

## Supplementary Material: S2: Semi-structured Interview Prompts Template

**INTERVIEW PROMPTS TEMPLATE INSTRUCTIONS:** The purpose of the interview is to extract rich data, including observational data, from the case study information where gaps in information were noted (e.g. little to no information on one or more project stages, design procedures, monitoring or testing arrangements, etc.)

### GENERAL INFORMATION

**Project (case study) title:**

**ECOMED Contact Person:**

### Part 1: PROCESS

The interviewee should describe each phase of the ecoengineering project in detail including both positive and negative aspects of the process.

Project Phases include: Pre-design/Planning, Design, Construction, Operations/Maintenance, and Monitoring and Decommissioning.

#### Prompts/focus areas:

**Overview of Process:**

**Pre-Design/Planning Activities:**

**Design Activities:**

**Construction Activities:**

**Operations/Maintenance Activities:**

**Monitoring Activities:**

**Decommissioning Activities:**

### Part 2:

#### Prompts/ focus areas:

**INFORMATION AND TOOLS:** the interviewee should list up to five information resources (e.g. databases, datasets) and/or software tools that were utilized in the design/construction of the project. If websites were used, they should describe aspects of the websites that were most effective.

**PRODUCTS AND SYSTEMS:** the interviewee should describe how the construction materials, systems and product selection addressed the following topics: accessibility, aesthetics, cost-effectiveness, functionality, historic preservation, productivity, security/safety, and sustainability.

## **PROJECT RESULTS**

**Lessons Learned:** the interviewee should describe goals that were met and goals that were not achieved (especially the ones relating to accessibility, aesthetics, cost-effectiveness, functionality, productivity, stability, and sustainability) and the reasons for these outcomes.

**Ratings:** the interviewee should list and describe any Quality Assurance/Management ratings of this project including date and level achieved.

**Awards:** the interviewee should list and describe any awards associated with this project including award name, date, category.

**Publications:** The interviewee should list or refer to any book, periodical, or website/database (if any) in which this project has appeared including: publication name, publisher, publication date, volume, issue, page or URL.
